# Supplementary material for: Differentiation and focal adhesion of adipose-derived stem cells on nano-pillars arrays with different spacing
Source: Royal Society of Chemistry journal article supplement (doi:10.1039/c5ra07608k), 2015-01-01
Supplement: c5ra07608k1.pdf [file c5ra07608k1.pdf]

### Supporting Information

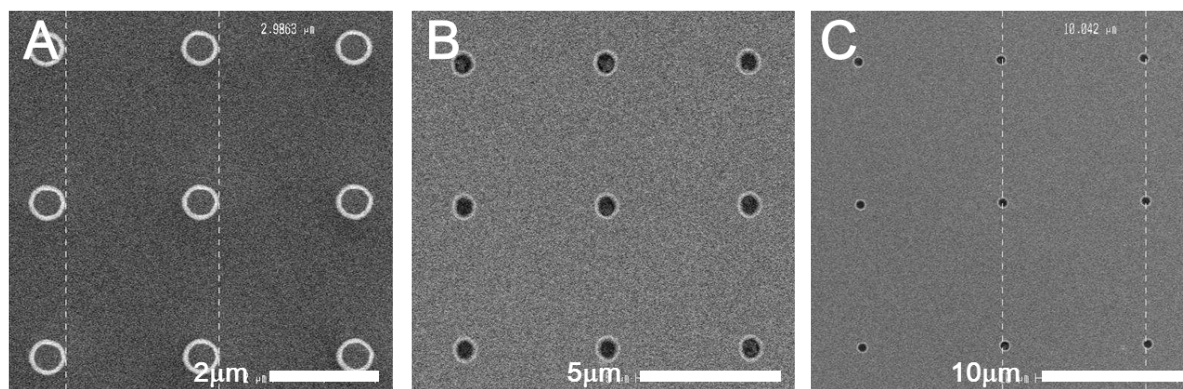

**Figure S1.** SEM images of top view of hole array on a patterned silicon wafer surface. The nano-holes were (A) 3 μm, (B) 5 μm and (C) 10 μm center-to-center distance with 1 μm height and 500 nm diameter.

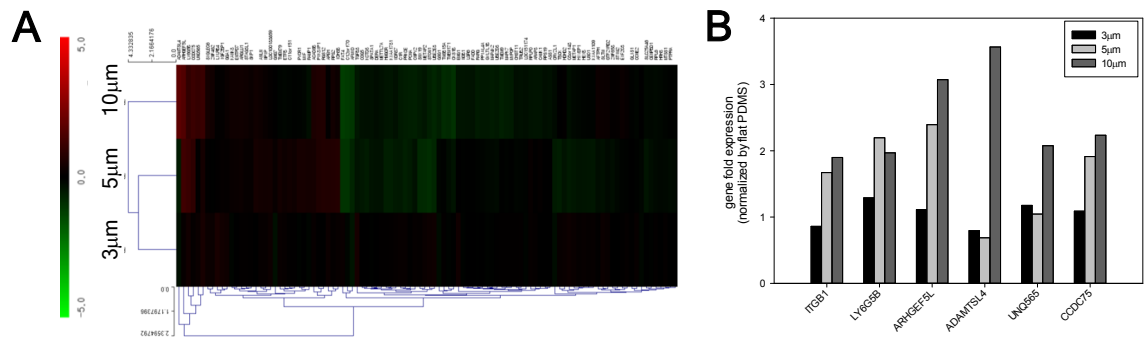

**Figure S2.** (A) Heat maps and hierarchical clustering of significant genes filtered by focal adhesion molecules. (B) Gene fold expression of focal adhesion molecules.

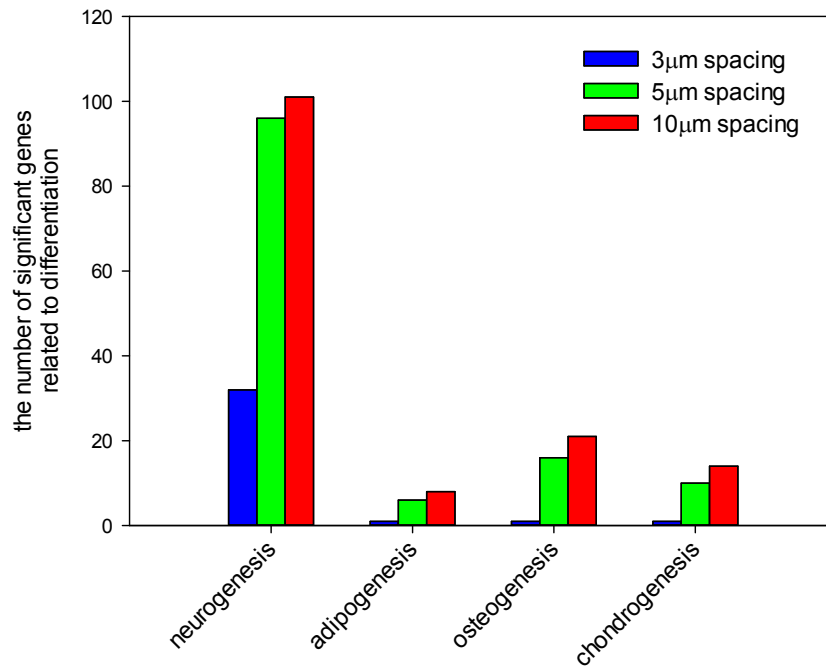

**Figure S3.** The number of significant genes related to differentiation classified differential lineage based on the microarray result.

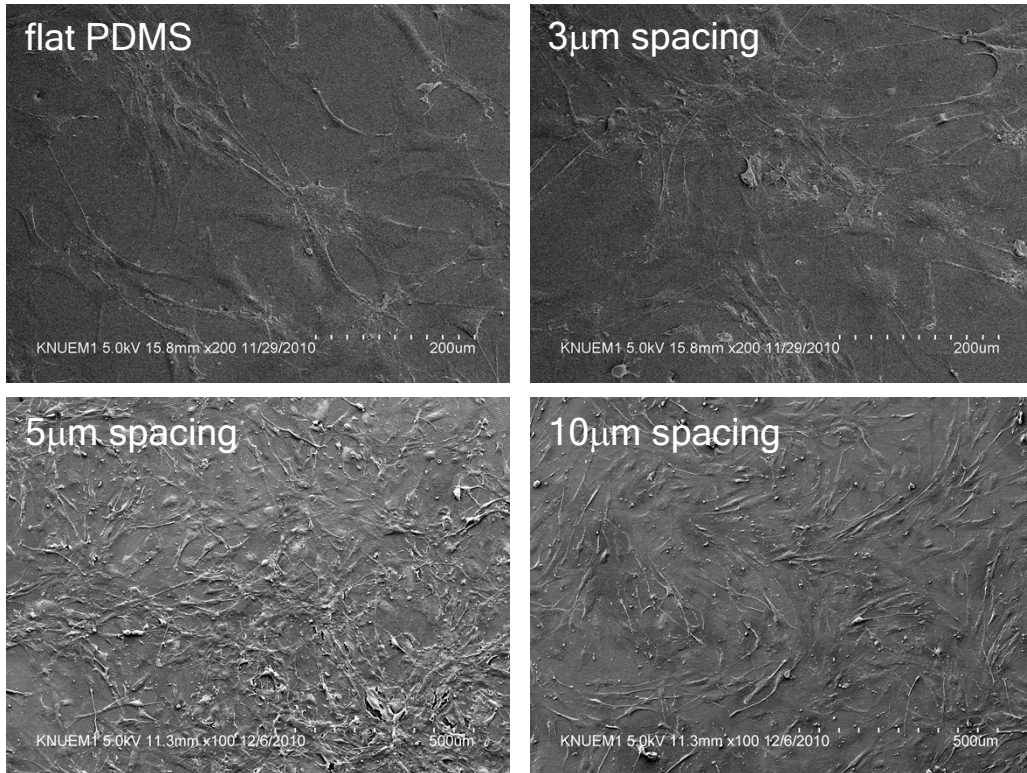

**Figure S4.** SEM images of ADSC cultivated on the various surfaces for 7 days.

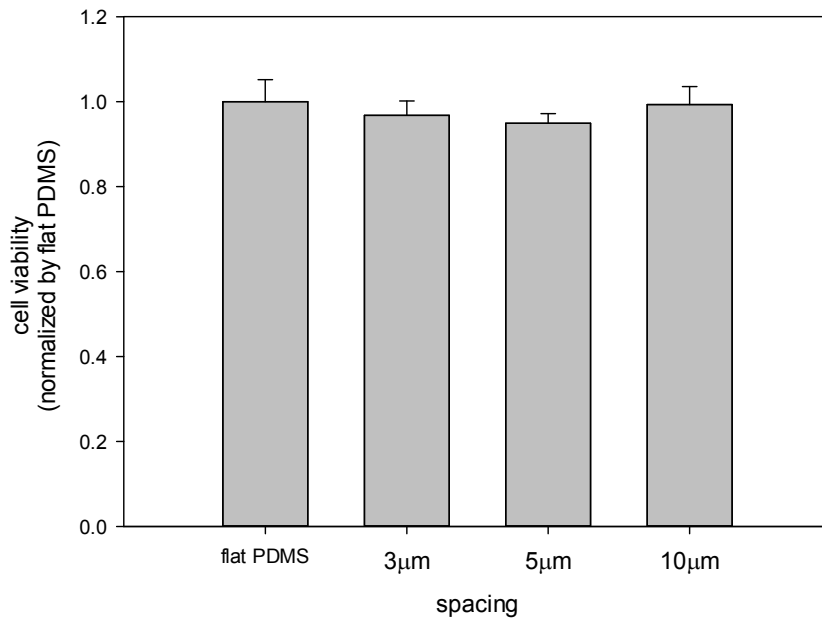

**Figure S5.** Cell viability of ADSCs on the PDMS pillar arrays with respect to flat PDMS surfaces. All data are statistically significant ( $p < 0.05$ ) by one-way ANOVA.
